# Supplementary material for: Testing the validity of the attention control video: An eye-tracking approach of the ego depletion effect
Source: PLOS journal article supplement (doi:10.1371/journal.pone.0211181), 2019-01-22
Supplement: S2 (10.1371/journal.pone.0211181.s002) [file journal.pone.0211181.s002.pdf]

---

**Article title:** Testing the validity of the attention control video: an eye-tracking approach

**Author names:** Chris Englert, Dennis Koroma, Alex Bertrams & Corinna S. Martarelli

**Corresponding author:** Chris Englert, University of Bern, Institute of Educational Science, Department of Educational Psychology, Fabrikstrasse 8, 3012 Bern, Switzerland, Phone: +41 (0)31 631 8275, Email: christoph.englert@edu.unibe.ch

**Descriptive Statistics: Means and Standard Deviations for Condition by Type of Standardization of the Transcription Task.**

|                                       | <b>Depletion – fixed length of time<br/><i>M (SD), n = 29</i></b> | <b>Depletion – fixed number of words<br/><i>M (SD), n = 29</i></b> | <b>Control – fixed length of time<br/><i>M (SD), n = 27</i></b> | <b>Control – fixed number of words<br/><i>M (SD), n = 27</i></b> |
|---------------------------------------|-------------------------------------------------------------------|--------------------------------------------------------------------|-----------------------------------------------------------------|------------------------------------------------------------------|
| SCS-K-D                               | 3.30 (0.49)                                                       | 2.98 (0.49)                                                        | 3.30 (0.54)                                                     | 3.22 (0.59)                                                      |
| Manipulation Check Transcription task | 2.36 (0.47)                                                       | 2.39 (0.54)                                                        | 1.77 (0.39)                                                     | 1.70 (0.43)                                                      |
| PANAS positive                        | 2.93 (0.69)                                                       | 2.89 (0.70)                                                        | 2.77 (0.80)                                                     | 2.71 (0.59)                                                      |
| PANAS negative                        | 1.29 (0.27)                                                       | 1.34 (0.27)                                                        | 1.29 (0.29)                                                     | 1.17 (0.20)                                                      |
| Report on gaze behavior Item 1        | 5.00 (1.54)                                                       | 4.48 (2.01)                                                        | 5.24 (1.55)                                                     | 4.63 (1.55)                                                      |
| Report on gaze behavior Item 2        | 4.83 (1.49)                                                       | 4.41 (1.53)                                                        | 4.45 (1.40)                                                     | 4.56 (1.50)                                                      |

*Note.* SCS-K-D = German short version of the Self-Control Scale. Manipulation Check Transcription Task = four-item manipulation check (e.g., “How strongly did you have to regulate your writing habits?”).

PANAS positive = German version of the Positive and Negative Affect Schedule – positive affect. PANAS negative = German version of the Positive and Negative Affect Schedule – negative affect. Report on gaze behavior Item 1 = “How strongly did you have to force yourself to not pay attention to the words”. Report on gaze behavior Item 2 = “How difficult was it to not pay any attention to the words?”
